# Supplementary material for: Controlled synthesis of LiNi0.5Mn1.5O4 cathode materials with superior electrochemical performance through urea-based solution combustion synthesis
Source: Royal Society of Chemistry journal article supplement (doi:10.1039/c5ra06109a), 2015-01-01
Supplement: c5ra06109a1.pdf [file c5ra06109a1.pdf]

**Electronic Supplementary information for**  
**Controlled synthesis of  $\text{LiNi}_{0.5}\text{Mn}_{1.5}\text{O}_4$  cathode materials with**  
**superior electrochemical performance through urea-based**  
**solution combustion synthesis**

By Chunyu Zhu \*, Cheng-gong Han, Tomohiro Akiyama

Center for Advanced Research of Energy & Materials, Hokkaido  
University, Sapporo 060-8628, Japan.

[\*] Dr. C. Zhu, E-mail: [chunyu6zhu@eng.hokudai.ac.jp](mailto:chunyu6zhu@eng.hokudai.ac.jp)

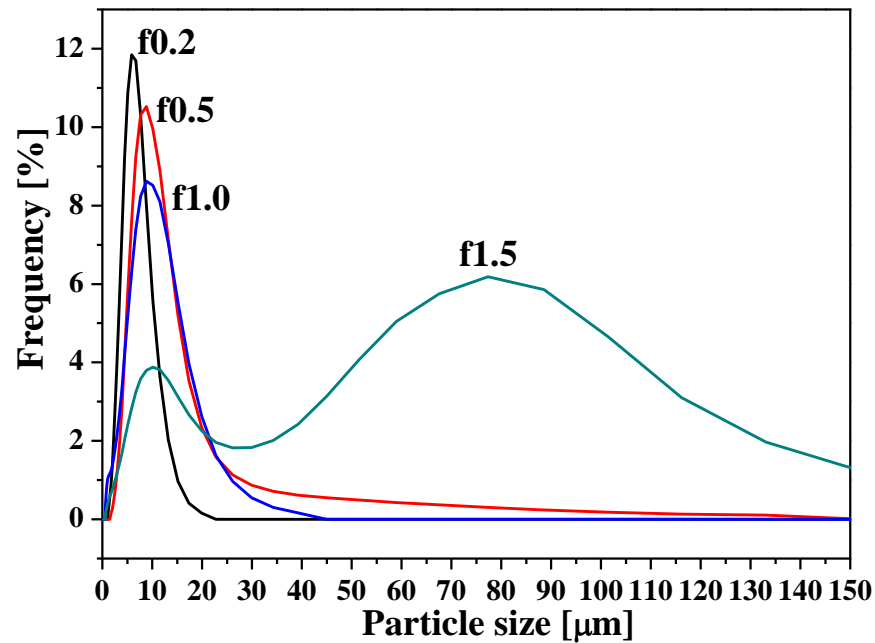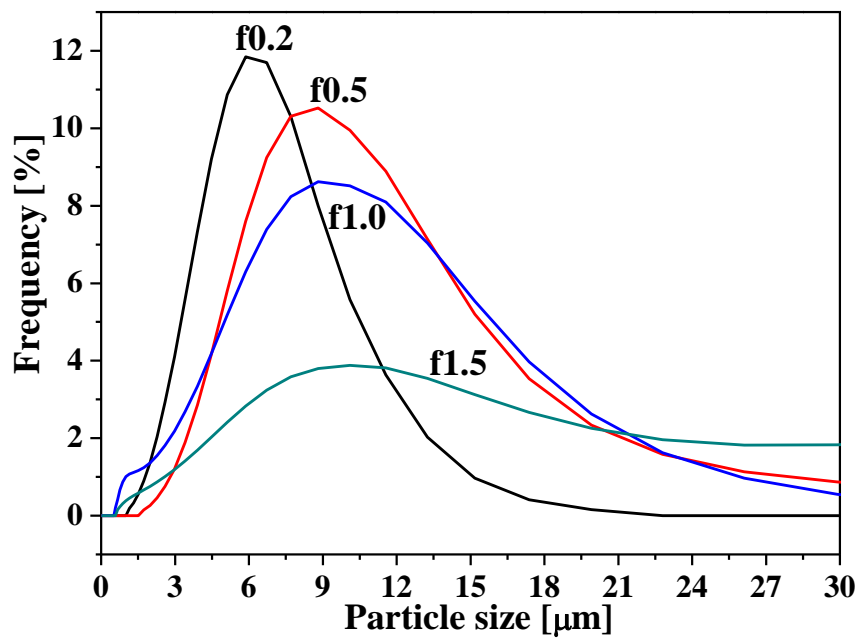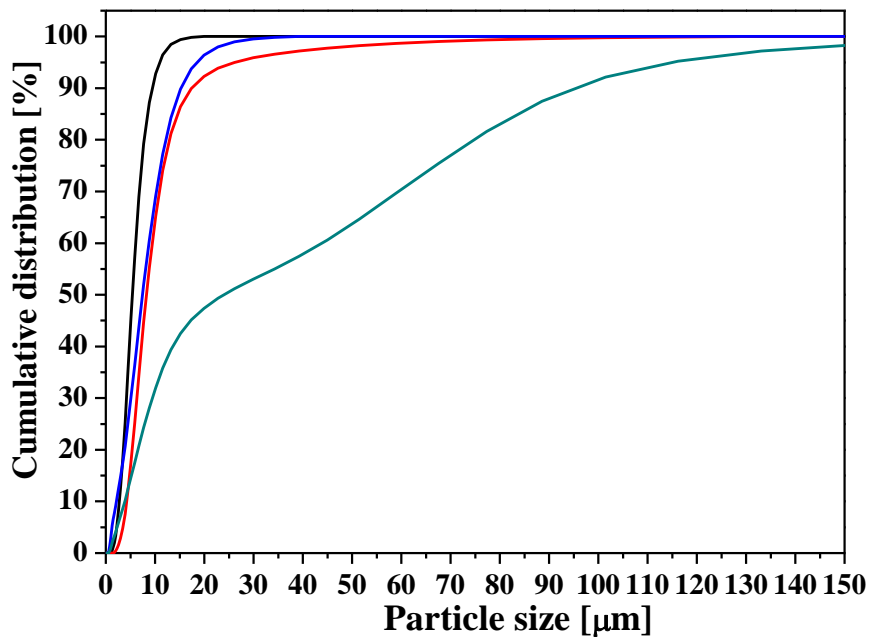

**Figure S1. Particle size distribution of the products.**

**Table S1. Particle size distribution of the obtained products**

| Sample name  | Average diameter [ $\mu\text{m}$ ] | Median diameter /d50 [ $\mu\text{m}$ ] | Modal diameter [ $\mu\text{m}$ ] | Geometric mean diameter [ $\mu\text{m}$ ] |
|--------------|------------------------------------|----------------------------------------|----------------------------------|-------------------------------------------|
| f0.2-800C24h | 5.8                                | 5.4                                    | 5.5                              | 5.2                                       |
| f0.5-800C24h | 10.9                               | 8.2                                    | 8.2                              | 8.6                                       |
| f1.0-800C24h | 8.4                                | 7.5                                    | 8.3                              | 6.5                                       |
| f1.5-800C24h | 40.7                               | 23.9                                   | 72.4                             | 21.3                                      |

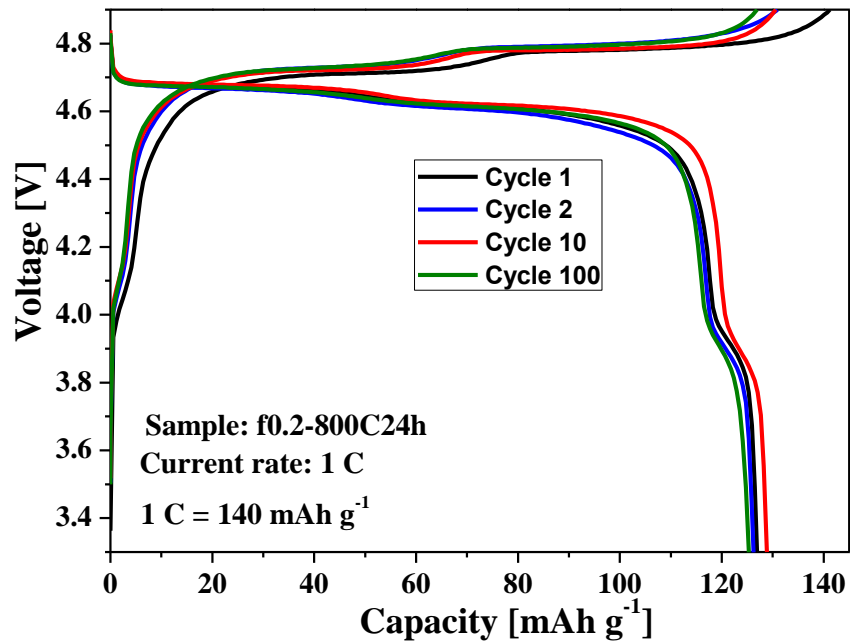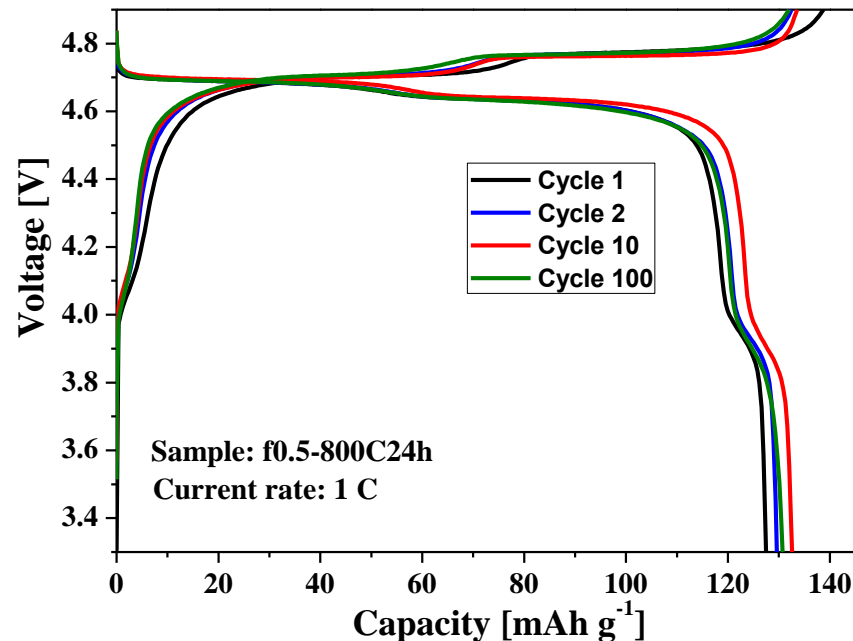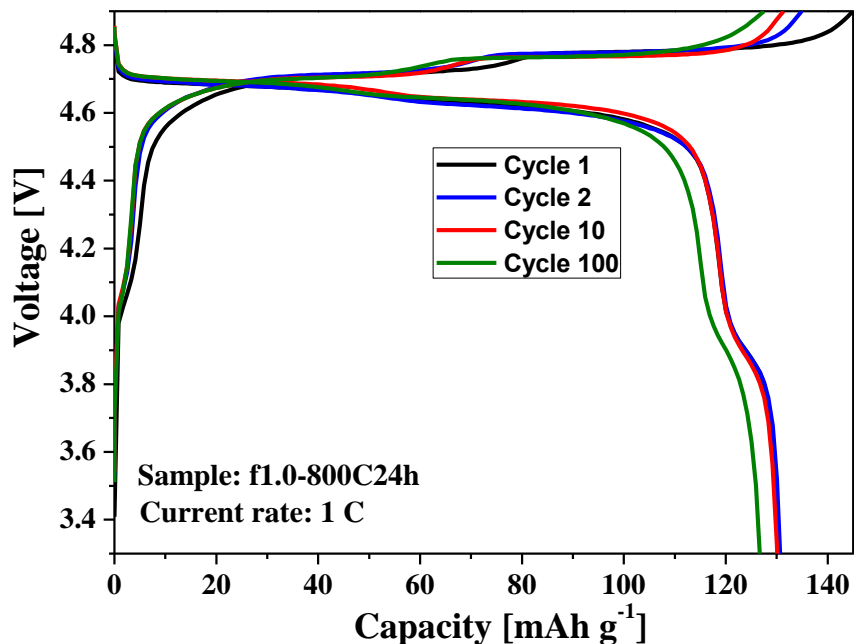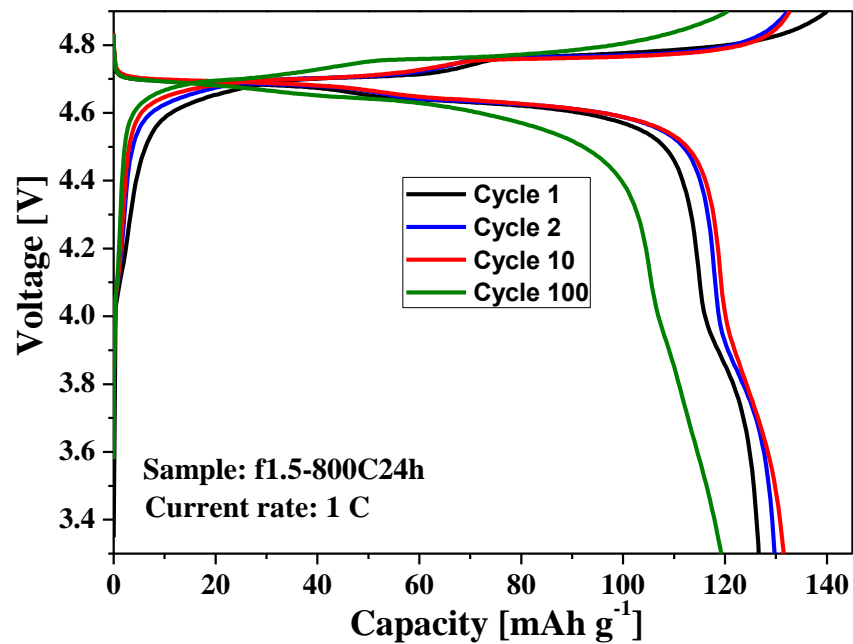

**Figure S2. Charge-discharge curves of the samples at different cycles at a current rate of 1 C.**

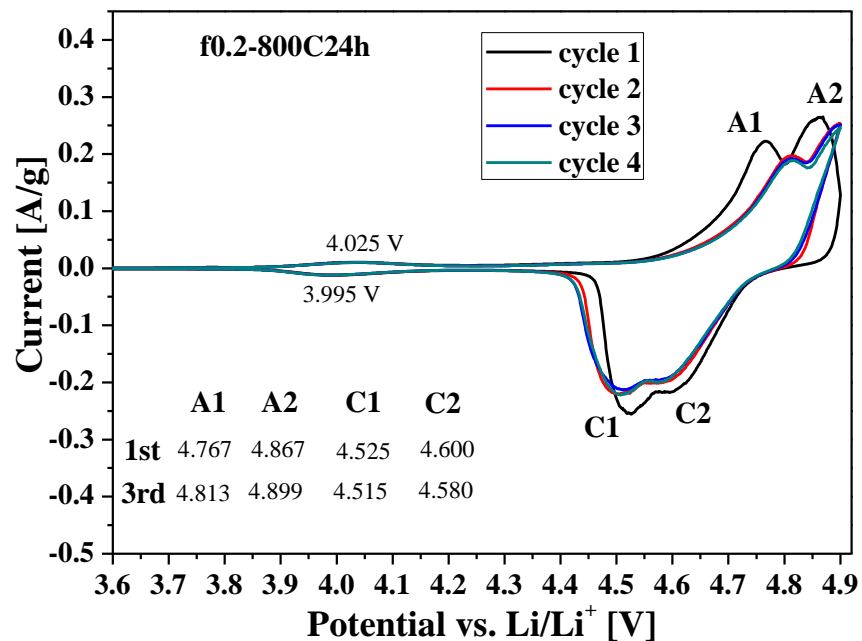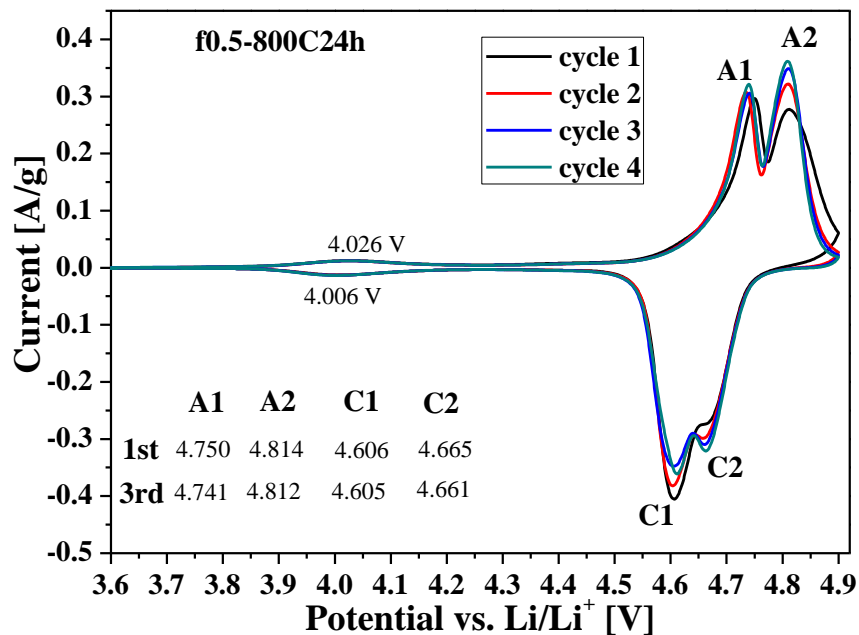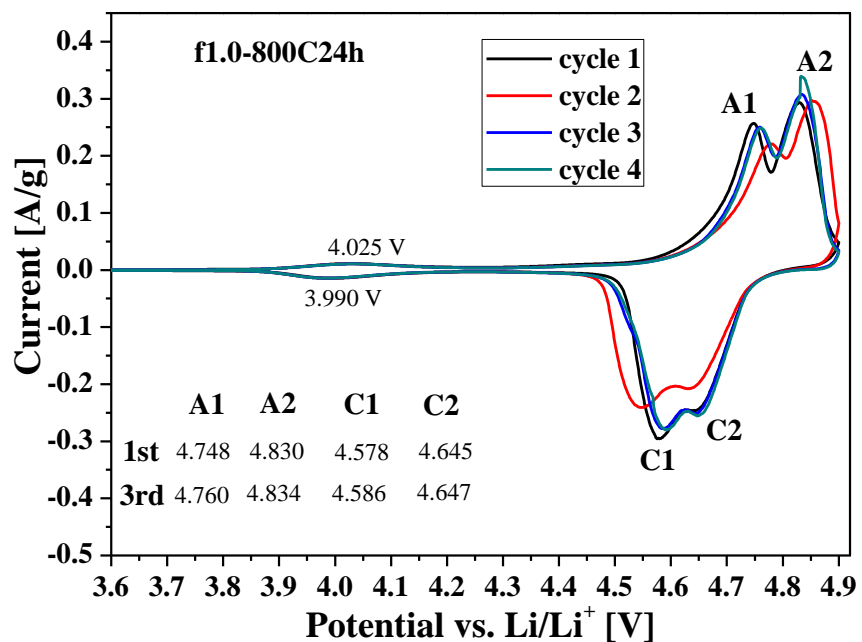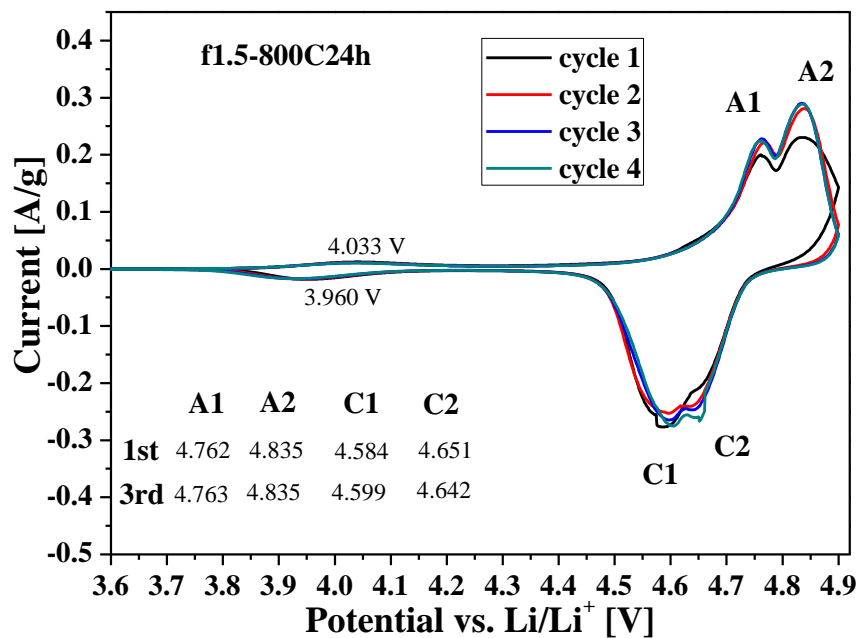

**Figure S3. CV curves of the samples at a scanning rate of 0.1 mV s<sup>-1</sup>.**

**Table S2. Difference between anodic and cathodic peak potentials of CV**

|              | A1-C1 [V]                   | A2-C2 [V] | A1-C1 [V]                   | A2-C2 [V] |
|--------------|-----------------------------|-----------|-----------------------------|-----------|
|              | <i>1<sup>st</sup> cycle</i> |           | <i>3<sup>rd</sup> cycle</i> |           |
| f0.2-800C24h | 0.242                       | 0.267     | 0.298                       | 0.319     |
| f0.5-800C24h | 0.144                       | 0.149     | 0.136                       | 0.151     |
| f1.0-800C24h | 0.170                       | 0.185     | 0.174                       | 0.187     |
| f1.5-800C24h | 0.178                       | 0.184     | 0.164                       | 0.193     |

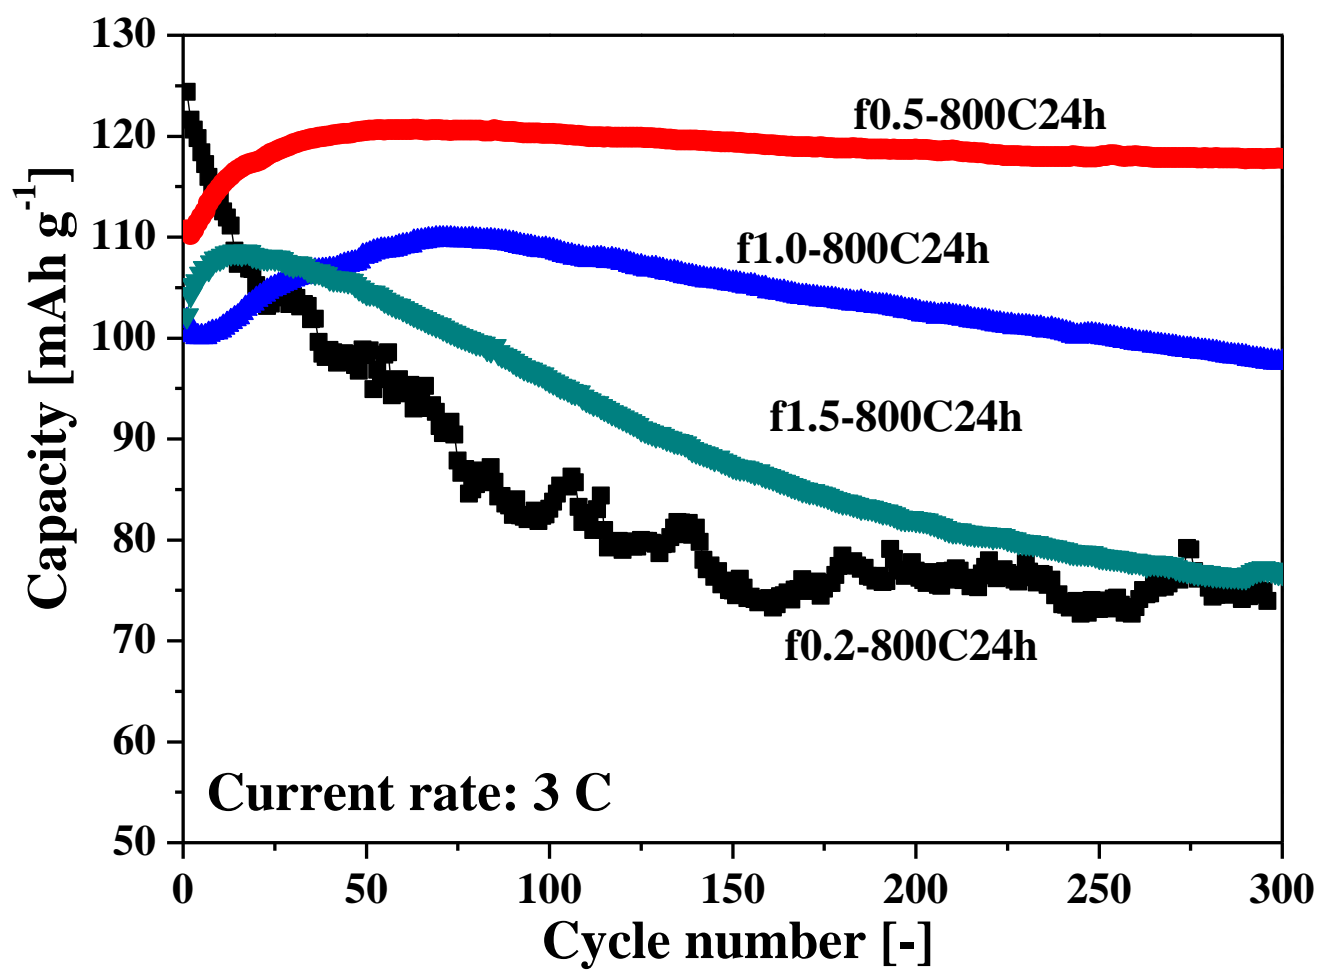

Figure S4. Cycling performance of the samples at a current rate of 3 C.

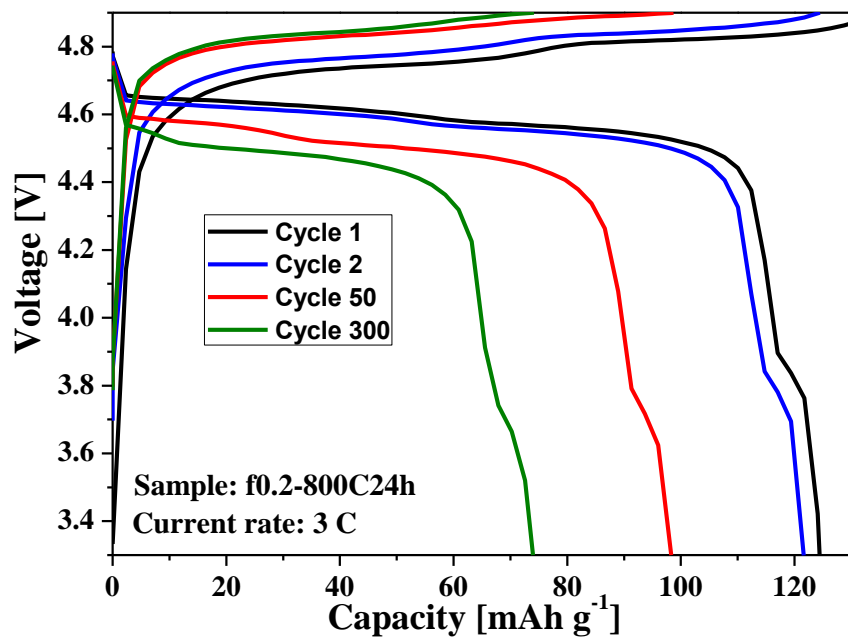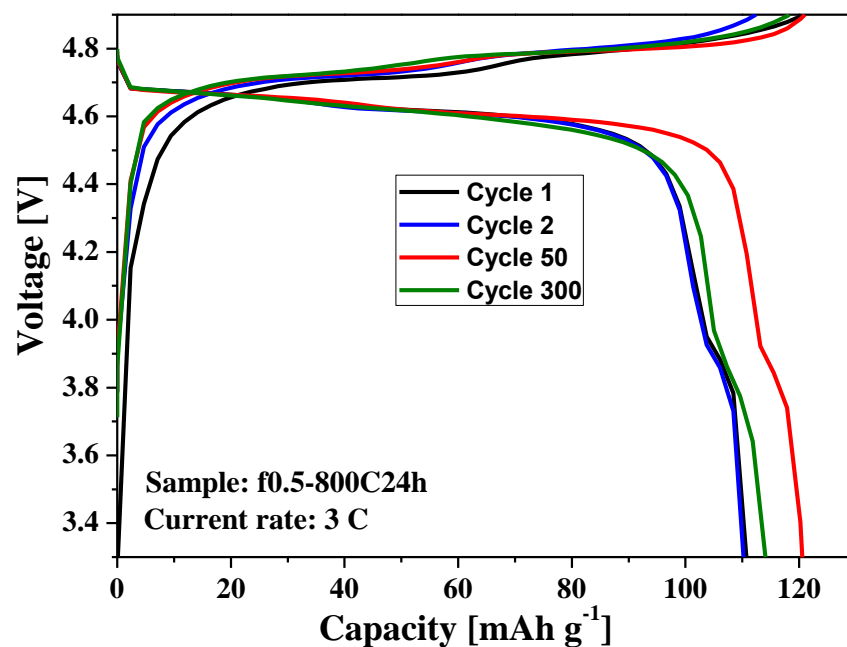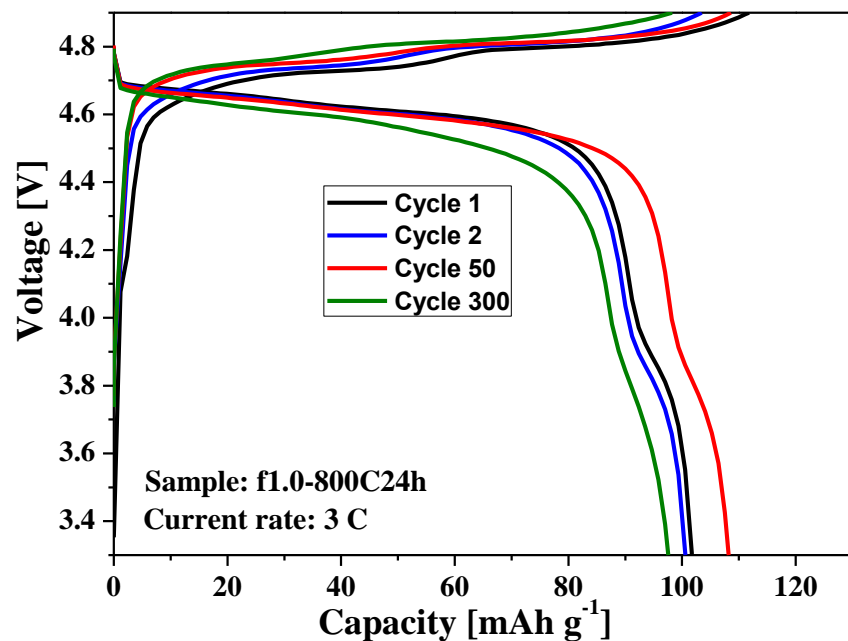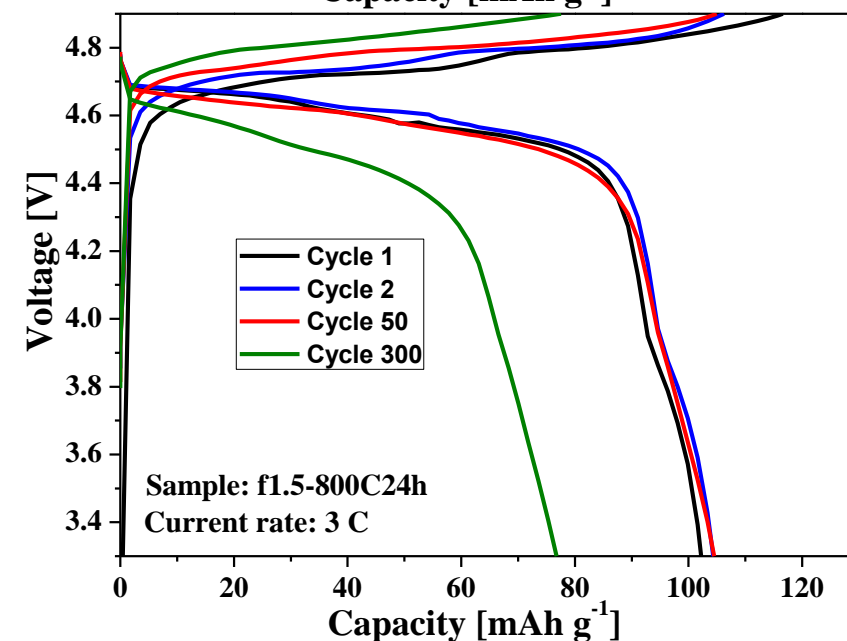

**Figure S5. Charge-discharge curves of the samples at different cycles at a current rate of 3 C.**



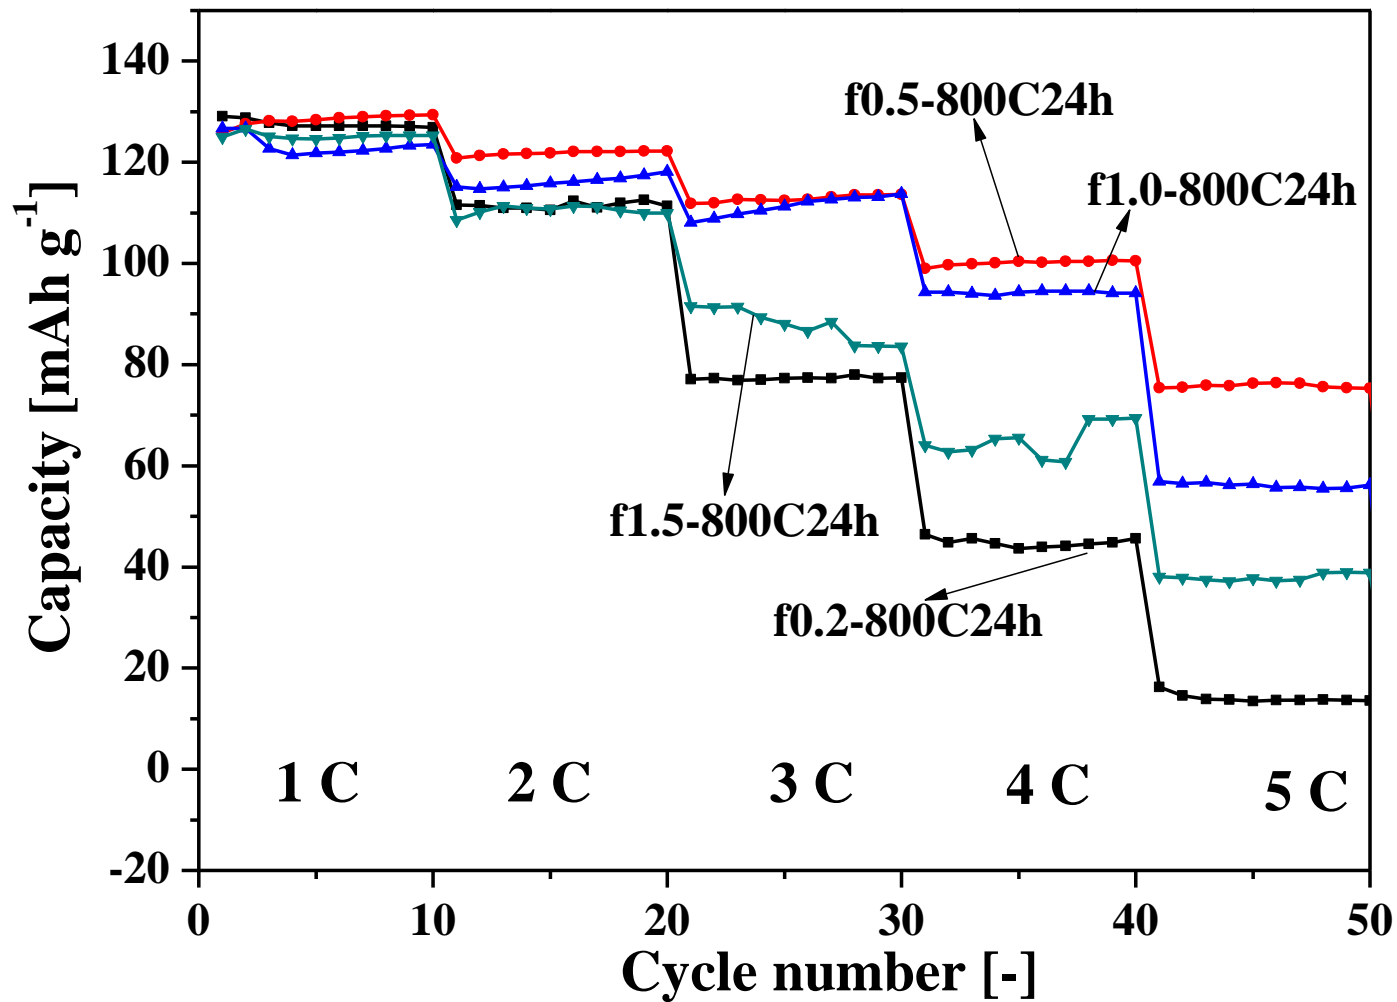

Figure S6. Cycling performance at various C rates.

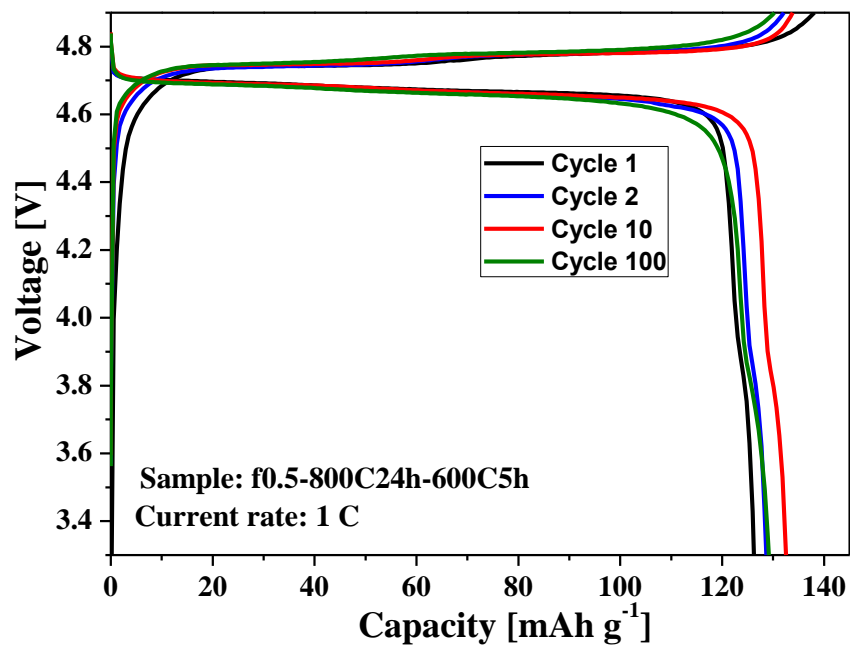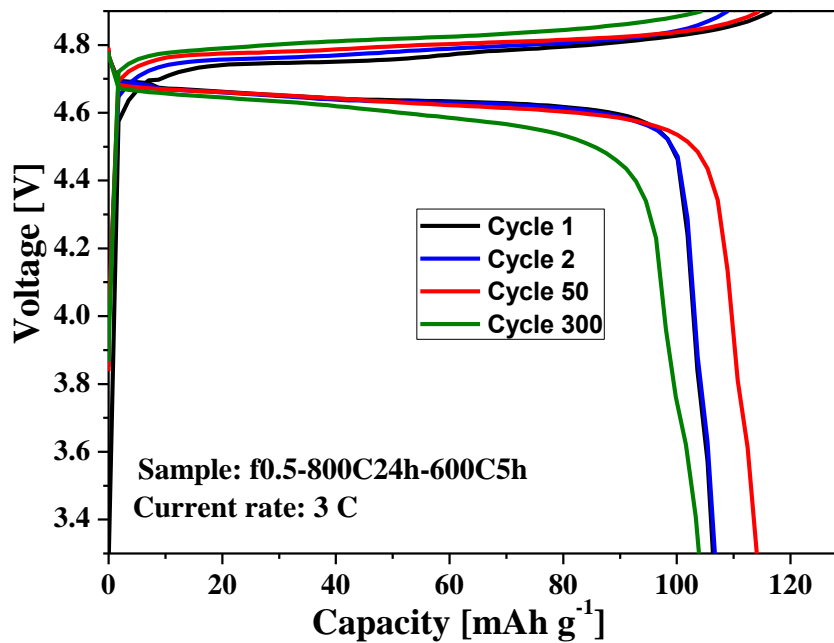

**Figure S7. Charge-discharge curves of the samples of f0.5-800C24h-600C5h at 1 C and 3 C.**
